# Supplementary material for: Influence of siloxane on the transport of ZnO nanoparticles from different release pathways in saturated sand
Source: Royal Society of Chemistry journal article supplement (doi:10.1039/c6ra22820h), 2016-01-01
Supplement: c6ra22820h1.pdf [file c6ra22820h1.pdf]

## Supplemental Materials for

### **Influence of siloxane on the transport of ZnO nanoparticles from different release pathways in saturated sand**

RSC Advances

Submitted: September 2016

Revised: October 2016

Sung Hee Joo<sup>a\*</sup>, Marc Knecht<sup>b</sup>, Chunming Su<sup>c</sup>, Seok-Ju Seo<sup>a</sup>, Randy Lawrence<sup>b</sup>

<sup>a</sup> *Civil, Architectural, and Environmental Engineering Department, University of Miami,  
1251 Memorial Dr. McArthur Engineering Building, Coral Gables, FL 33146, USA*

<sup>b</sup> *Chemistry Department, University of Miami, 1301 Memorial Dr. Coral Gables, FL, 33146, USA*

<sup>c</sup> *Ground Water and Ecosystems Restoration Division, National Risk Management Research  
Laboratory, Office of Research and Development, Environmental Protection Agency  
919 Kerr Research Dr. Ada, OK 74820, USA*

\*Corresponding author: telephone +1-305-284-3489; fax +1-305-284-3492; e-mail:

s.joo1@miami.edu

#### **Summary of Contents**

Number of Pages-----S1-S3

Number of Figures-----S2-S3

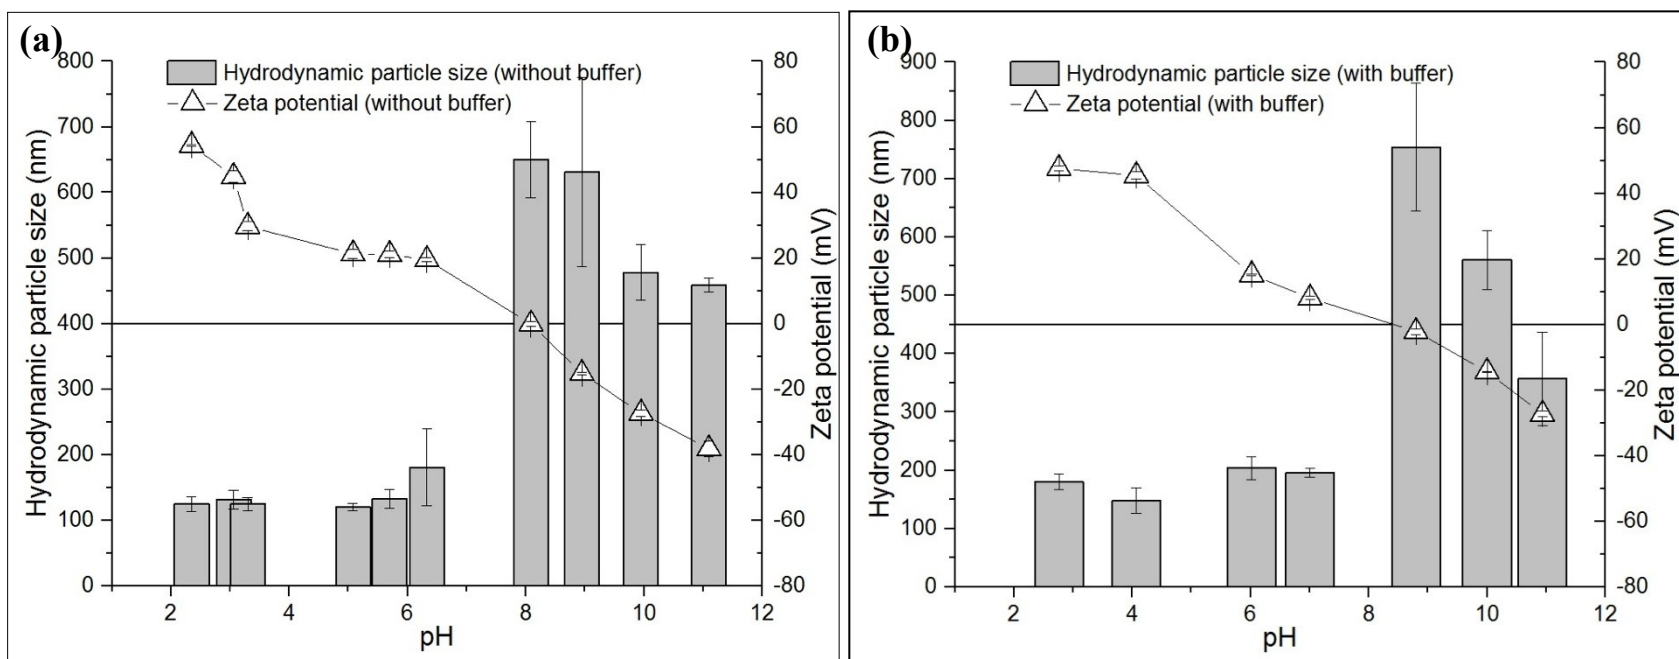

**Fig. S1.** The isoelectric point (IEP) of 50 mg/L nano-ZnO suspension in the absence (a) and presence (b) of a buffer (1 mM  $\text{Na}_2\text{CO}_3$ ) of a working solution and hydrodynamic particles size of nano-ZnO as a function of pH.

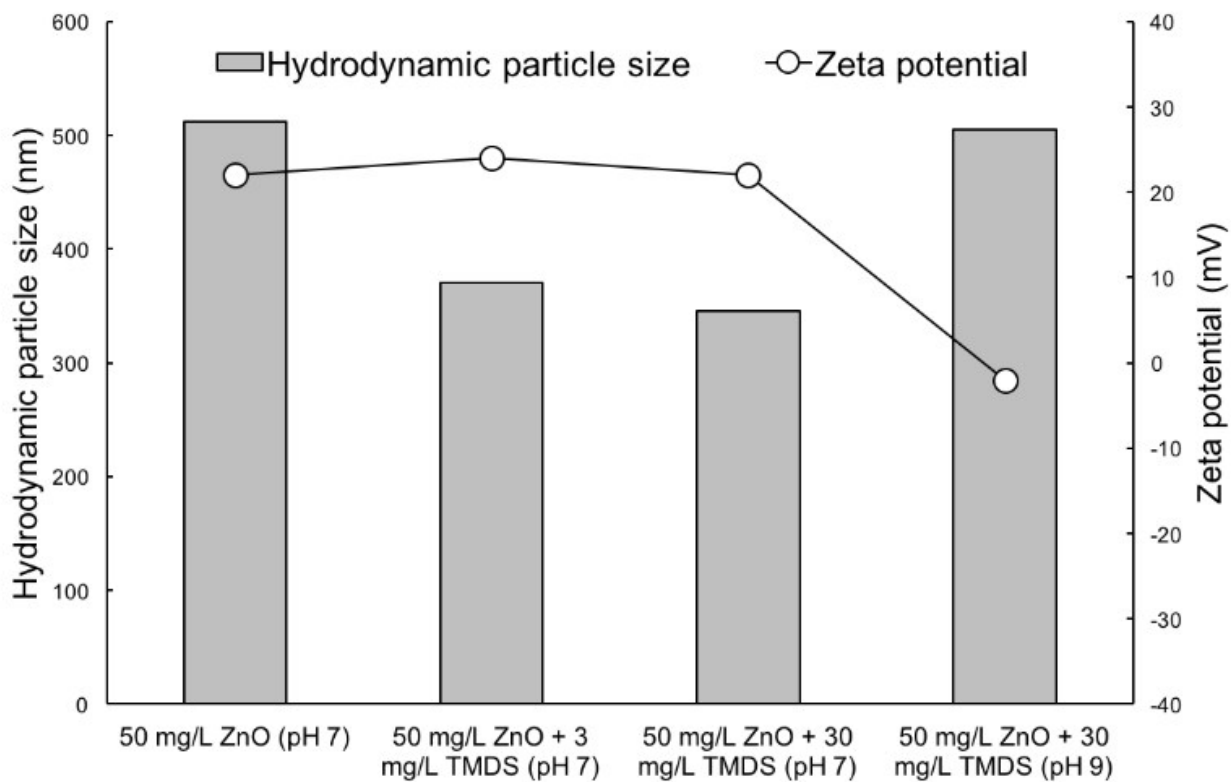

**Fig. S2.** Zeta potential (mV) and hydrodynamic particle size (nm) of nano-ZnO suspension in the presence and absence of TMDS.
